# Supplementary material for: Fabrication of 1D nickel sulfide nanocrystals with high capacitances and remarkable durability
Source: Royal Society of Chemistry journal article supplement (doi:10.1039/c4ra08917k), 2014-09-23
Supplement: c4ra08917k1.pdf [file c4ra08917k1.pdf]

## **Fabrication of 1D Nickel Sulfide Nanocrystals with High Capacitances and Remarkable Durability**

*Zhuo Wang, Caiyun Nan, Dingsheng Wang\* and Yadong Li*

### **Experimental Section:**

*Material synthesis:* Experimental Details. All chemical reagents used in this work were analytical grade without further purification. Synthesis of NiS nanorods: NiCl<sub>2</sub> (0.1 g) was added in 1-dodecanethiol (10 mL) under stirring. The reactant mixture was then transferred into a 15 mL Teflon-lined autoclave and heated at 200 °C for 20 h, named as NiS-NR (sample 1). The synthesis of NiS nanowires, named as NiS-NW (sample 2) were similar with NiS nanorods, excepted that NiCl<sub>2</sub> was replaced by Ni(acac)<sub>2</sub>, however, while using Ni(NO<sub>3</sub>)<sub>3</sub> as the precursor, mixture of NiS and Ni<sub>9</sub>S<sub>8</sub> were obtained (sample 3).

Synthesis of Nickel sulfides nanoparticles: Ni<sub>3</sub>S<sub>2</sub> nanoparticles were prepared by a typical solvothermal method with 1-octadecene (ODE, 5 mL) and oleylamine (OAm, 5 mL) as solvent in a three-neck flask, 0.1 g Ni(acac)<sub>2</sub> and 0.05 g sulfur powder were added at 80 °C, then heating to 200 °C and kept for 20 minutes (sample 4). NiS<sub>2</sub> nanoparticles were obtained by at the same process as sample 1 except with Na<sub>2</sub>S as sulfur source (sample 5). The using of thiourea resulted in a mixture of NiS and Ni<sub>3</sub>S<sub>4</sub> (sample 6).

Besides, NiS nanorods can be obtained by an alternative method: 0.1 g Ni(acac)<sub>2</sub> was added into three-neck flask at 80 °C, then the reaction mixture were heated to 200

°C for 20 minutes, Ni-dodecanethiol complex was obtained (sample 7), while raising the temperature to 240 °C, NiS nanorods were obtained (sample 8).

*Material Characterizations:* The X-ray Diffraction (XRD) patterns of samples were collected on a Rigaku D/max-2400 diffractometer operated at 40 kV voltage and a 200 mA current with Cu Ka radiation ( $\lambda = 1.5418 \text{ \AA}$ ). The morphologies were analyzed on a Hitachi H-800 transmission electron microscope (TEM) and scanning electron microscopy (SEM, HitachiS-3000N) techniques. High-resolution scanning electron microscopy (HRTEM) images were recorded by a FEI Tecnai G2 F20 S-Twin high-resolution transmission electron microscope working at 200 kV and a FEI Titan 80–300 transmission electron microscope equipped with a spherical aberration (Cs) corrector for the objective lens working at 300 kV.

*Electrochemical measurement:* All the electrochemical measurements were carried out in a conventional three-electrode system in 6 M KOH aqueous electrolyte at room temperature. The as-synthesized electrode materials, a platinum wire electrode and a silver chloride electrode (Ag/AgCl) were used as working electrode, counter electrode and reference electrode, respectively. The working electrode was prepared by mixing sample (90 wt%) as an active material with poly(tetrafluoroethene) (PTFE, 10 wt%) in ethanol to produce a homogeneous paste. Then the resulting mixture was coated onto the Ni foam substrate. The foam was dried at 80 °C in air for 12 h to remove the solvent. The electrochemical performances of the as-prepared material electrodes were tested using a cyclic voltammetry (CV) method, galvanostatic charge/discharge and electrochemical impedance spectroscopy (EIS) on an electrochemical workstation

(CHI 660D, Shanghai CH Instrument Company, China). The measurements were carried out in 6 M KOH aqueous electrolyte at room temperature. CV tests were done between 0 V and 0.5 V (vs SCE) at scan rates of 2, 10, 20, 40, 50 mV•s<sup>-1</sup>. Galvanostatic charge/discharge curves were measured in the potential range of 0 – 0.4 V at different current densities, and the EIS measurements were carried out in the frequency range from 100 kHz to 0.1 Hz at open circuit potential with an ac perturbation of 5 mV.

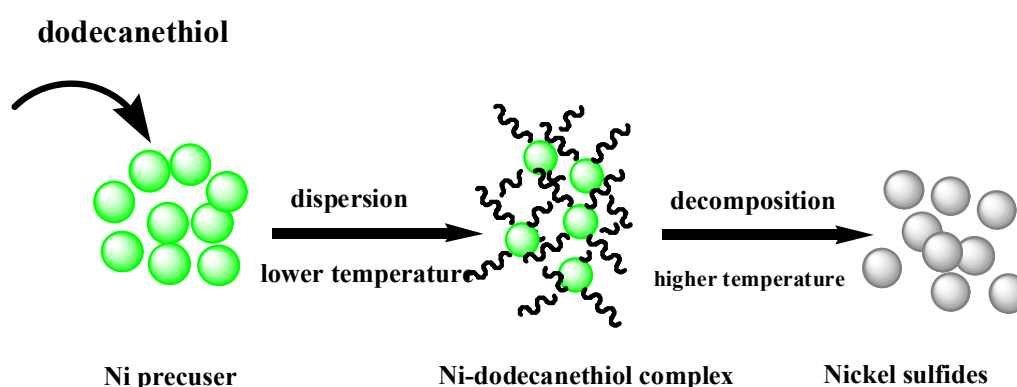

Scheme 1. The scheme of the mechanism of synthetic procedure.

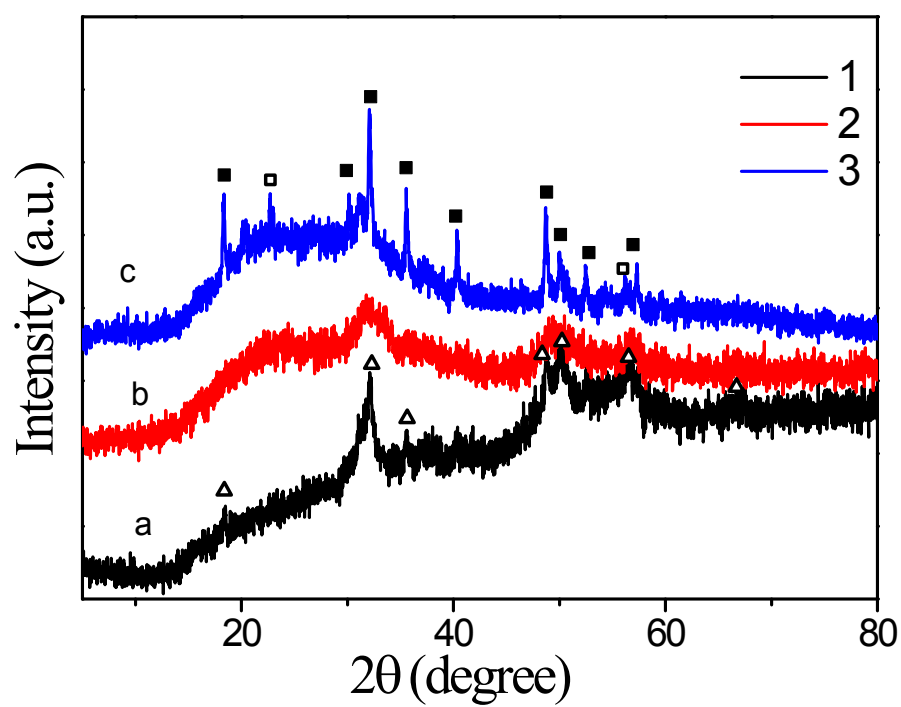

Figure S1 XRD patterns of as-synthesized nickel sulfides (Sample **1-3**, 1 for NiS NR, 2 for NiS NW and 3 for NiS and Ni<sub>3</sub>S<sub>2</sub>)

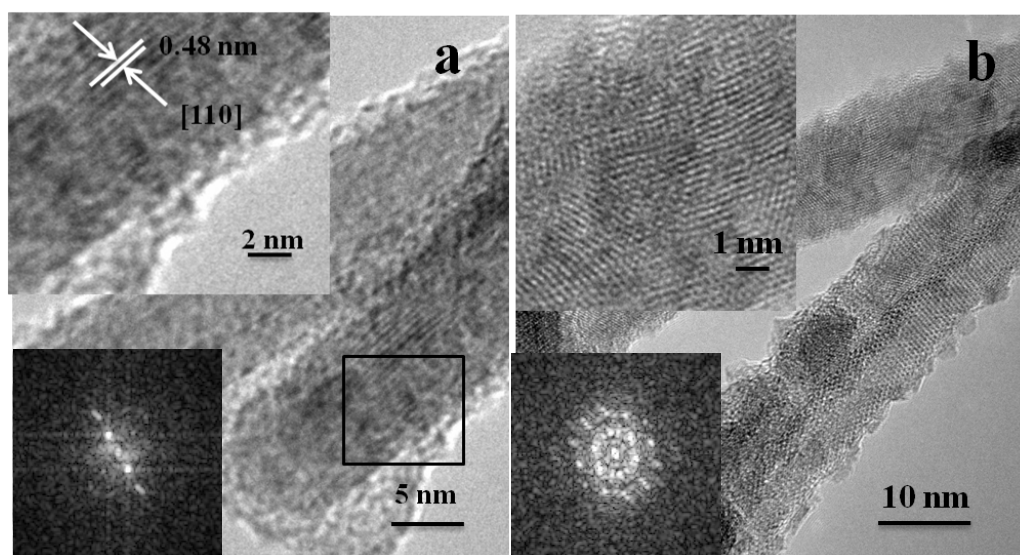

Figure S2 HRTEM images of NiS-NR (a) and NiS-NW (b)

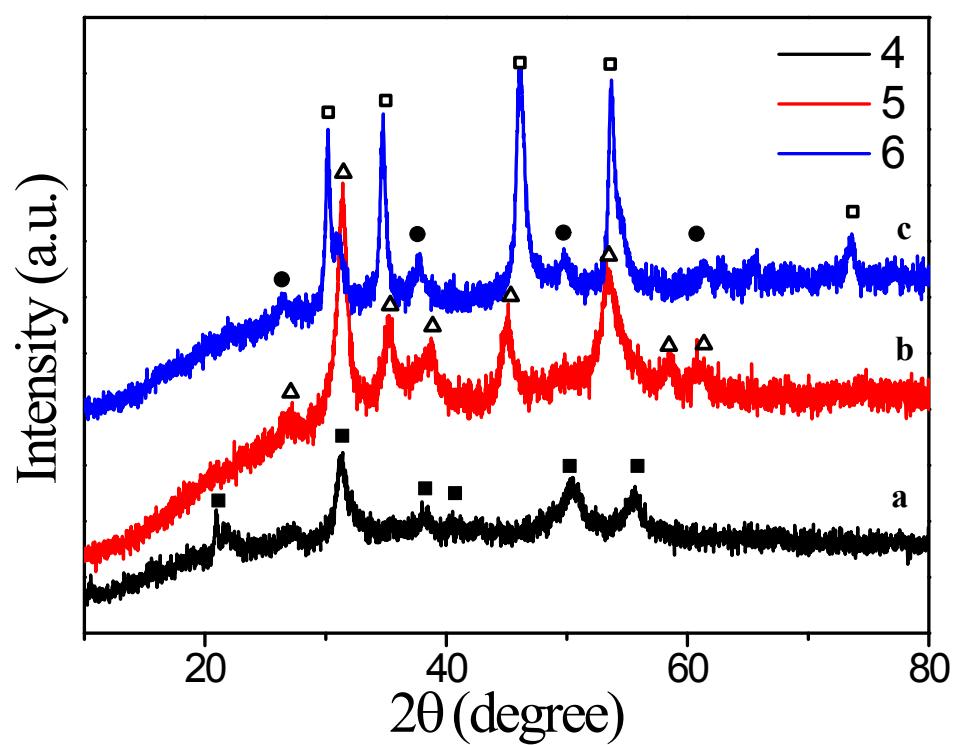

Figure S3 XRD patterns of as synthesized sample 4-6 (4 for  $\text{Ni}_3\text{S}_2$ , 5 for  $\text{NiS}_2$ , 6 for  $\text{NiS}$  and  $\text{Ni}_3\text{S}_4$ )

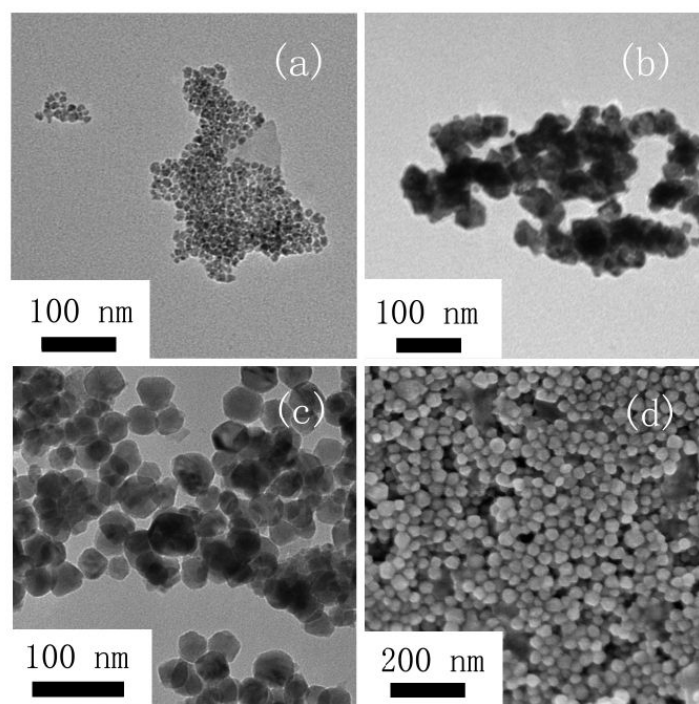

Figure S4 Typical TEM images of nickel sulfides (a)-(c) (sample 4-6), (d) SEM image of sample 6

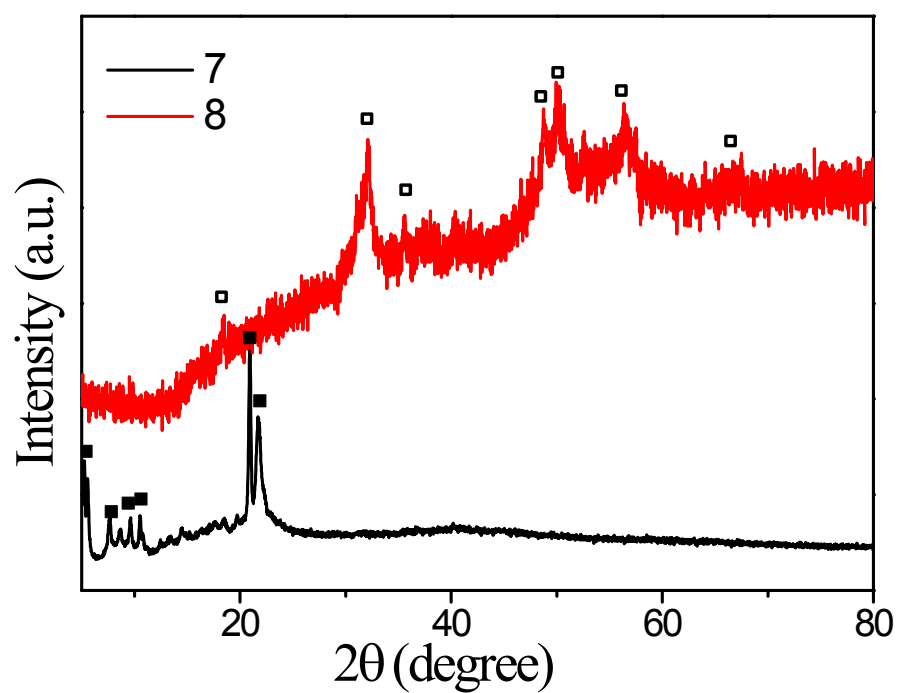

Figure S5 XRD patterns of as synthesized sample 7-8 (7 for nickel-dodecanethiol complex, 8 for NiS)

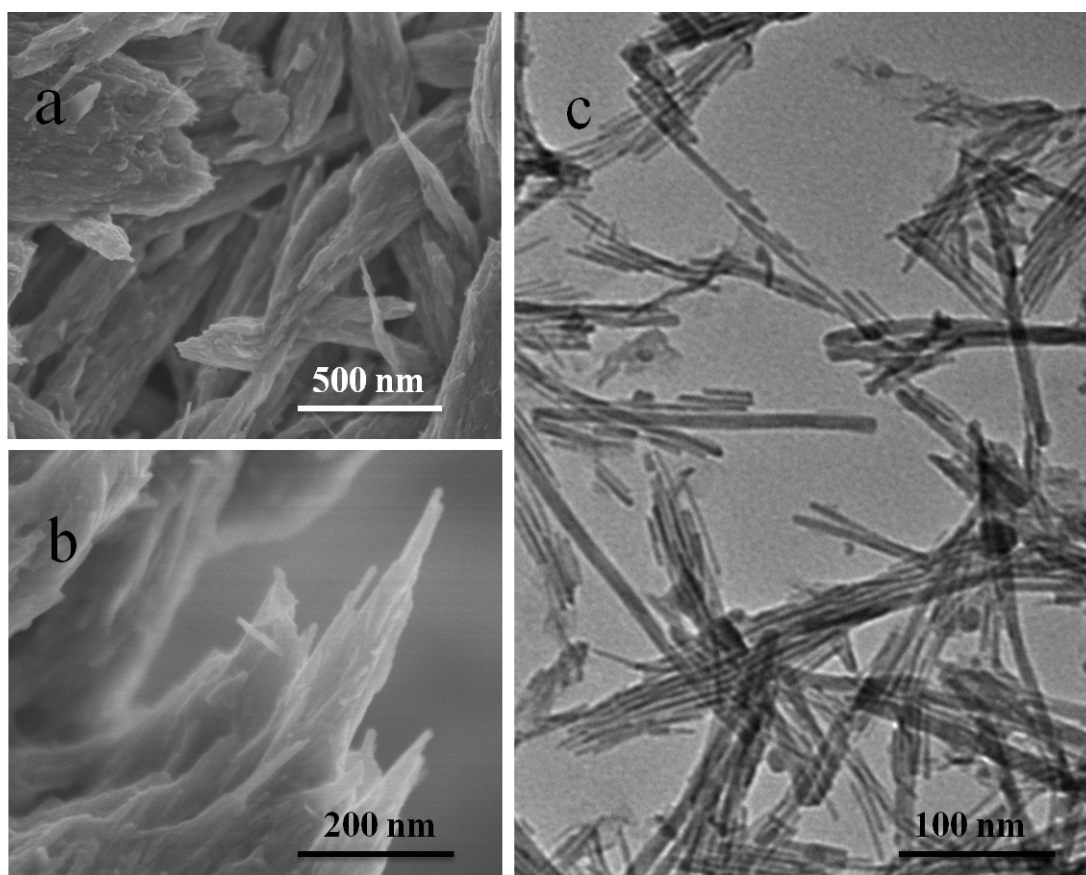

Figure S6 SEM and TEM images of NiS nanorods (Sample 8)

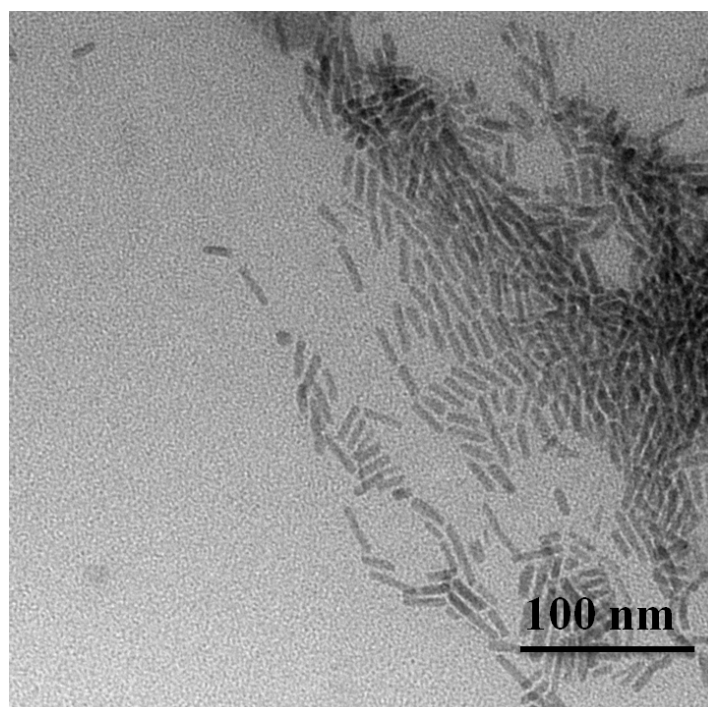

Figure S7 Typical TEM image of nickel- Dodecanethiol complexes (sample 7)

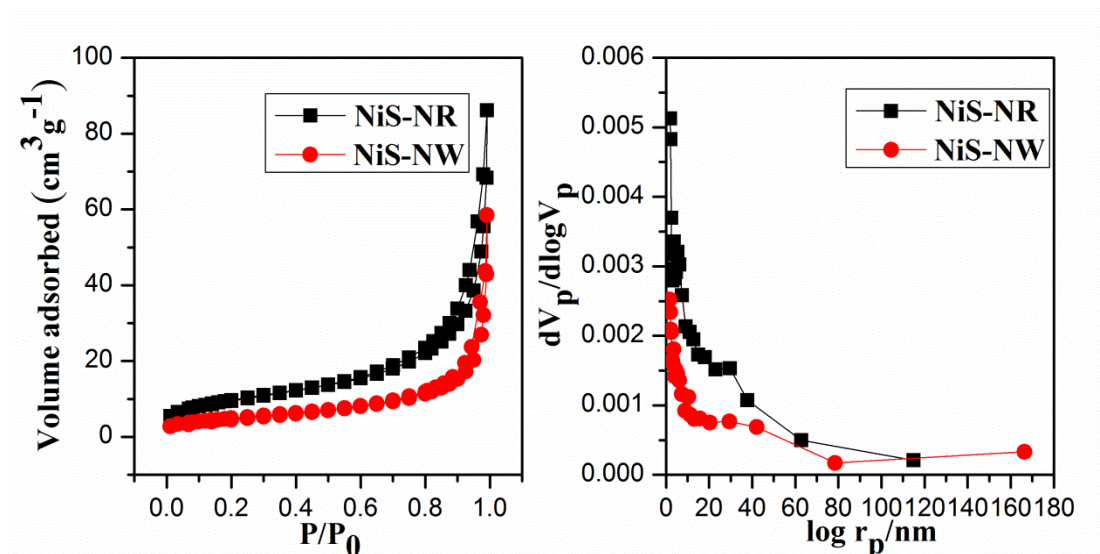

Figure S8 Nitrogen adsorption/desorption isotherms (a) and BJH pore size distributions (b) for NiS-NR and NiS-NW nanomaterials.



Table S1. The synthesis parameters of different nickel sulfids products

| Samples  | Metal sources                     | Sulfides sources  | solvents | Temperatue (°C) | products                            | Time   |
|----------|-----------------------------------|-------------------|----------|-----------------|-------------------------------------|--------|
| <b>1</b> | NiCl <sub>2</sub>                 | dodecanethiol     | -        | 200             | NiS-NW                              | 20 h   |
| <b>2</b> | Ni(acac) <sub>2</sub>             | dodecanethiol     | -        | 200             | NiS-NR                              | 20 h   |
| <b>3</b> | Ni(NO <sub>3</sub> ) <sub>3</sub> | dodecanethiol     | -        | 200             | NiS, Ni <sub>3</sub> S <sub>2</sub> | 20 h   |
| <b>4</b> | Ni(acac) <sub>2</sub>             | sulfur powder     | ODE, OAM | 200             | Ni <sub>3</sub> S <sub>2</sub>      | 20 min |
| <b>5</b> | Ni(acac) <sub>2</sub>             | Na <sub>2</sub> S | ODE, OAM | 200             | NiS <sub>2</sub>                    | 20 min |
| <b>6</b> | Ni(acac) <sub>2</sub>             | thiourea          | ODE, OAM | 200             | NiS, Ni <sub>3</sub> S <sub>4</sub> | 20 min |
| <b>7</b> | Ni(acac) <sub>2</sub>             | dodecanethiol     | -        | 200             | Ni-dodecanethiol                    | 20 min |
| <b>8</b> | Ni(acac) <sub>2</sub>             | dodecanethiol     | -        | 240             | NiS                                 | 20 min |

Table S2 The capacitances of NiS-NR and NiS-NW at different current densities

| <b>Current Density</b><br><b>Sample</b> | <b>1 A/g</b> | <b>2 A/g</b> | <b>3 A/g</b> | <b>4 A/g</b> | <b>5 A/g</b> |
|-----------------------------------------|--------------|--------------|--------------|--------------|--------------|
| <b>NiS nanorods</b>                     | 1403.8 F/g   | 1077.5 F/g   | 948.0 F/g    | 875.5 F/g    | 870.8 F/g    |
| <b>NiS nanowires</b>                    | 859.8 F/g    | 696.5 F/g    | 654.8 F/g    | 624.0 F/g    | 494.0 F/g    |
